# Supplementary material
Source: publisher site journal article supplement (https://static.cambridge.org/content/id/urn:cambridge.org:id:article:S1832427420000493/resource/name/S1832427420000493supp001.pdf)
Supplement: Supplementary file 1 [file S1832427420000493supp001.pdf]

AUSTRALIAN TWIN STUDY OF LITERACY AND NUMERACY

**Twin Research and Human Genetics**

The Academic Development Study of Australian Twins: Research Aims and Design

Sally A. Larsen, Callie W. Little, Katrina Grasby, Brian Byrne, Richard K. Olson, and William L. Coventry

Supplementary Table S1. *Family Questionnaire items*

| Item                                         | Details                                                                                                      | Source                                                     |
|----------------------------------------------|--------------------------------------------------------------------------------------------------------------|------------------------------------------------------------|
| Family composition                           | Family members in household<br>Relationship status of parents<br>Number, age and relationship of siblings    |                                                            |
| Parent ancestry                              | Free text<br>Coded using Australian Census codes                                                             | Australian Bureau of Statistics (2016)                     |
| Parent education level                       | 9-point ordinal scale e.g.<br>1, 'some high school but did not finish' through<br>9, 'Doctoral degree'       |                                                            |
| Parent Occupation                            | Free text<br>Coded using the International Socio-Economic Index of<br>occupational status (ISEI)             | Ganzeboom & Trieman (1996), Ganzeboom<br>(2010)            |
| Number of books in the home                  | 5-point ordinal scale e.g.<br>1 = '0-10'; 2 = '11-25', 3 = '26-100', 4 = '101-200', 5 = '200+'               |                                                            |
| Access to educational resources              | Select from items including 'Atlas', 'Computer' etc.                                                         | Smith & Hausafus (1998)                                    |
| Parent attitude to mathematics               | 4 items from Attitudes towards Math and Science Questionnaire<br>5-point Likert responses [Agree – Disagree] | Smith & Hausafus (1998)                                    |
| Confusion, Hubbub and Order Scale<br>(CHAOS) | 6-item short form<br>5-point Likert responses [Definitely Untrue – Definitely True]                          | Some items from Matheny, Wachs, Ludwig<br>& Philips (1995) |
| Twin zygosity                                | 5 items<br>3-point responses                                                                                 | Lykken, Bourchard, McGue & Tellegen<br>(1990)              |
| Birth information                            | Premature birth / weeks gestation<br>Birthweights<br>Birth complications                                     |                                                            |
| Twin similarity                              | 1 item<br>5-point scale                                                                                      | Kendler & Prescott (2007)                                  |

AUSTRALIAN TWIN STUDY OF LITERACY AND NUMERACY

Supplementary Table S2. *Child-specific Questionnaire items*

| Item                                                                                                                                                         | Details                                                                                                                                                           |
|--------------------------------------------------------------------------------------------------------------------------------------------------------------|-------------------------------------------------------------------------------------------------------------------------------------------------------------------|
| Languages spoken*                                                                                                                                            | Free text                                                                                                                                                         |
| Health information<br>- Vision, speech, other language difficulties, hearing<br>- Medical problems (including allergies)<br>- Behavior regulation medication | Severity rating from 1= mild to 5 = severe<br>Text entry for additional details, diagnoses, prescribed care                                                       |
| Preschool or daycare attendance*                                                                                                                             | Start and finish age<br>Hours attended<br>Type of care                                                                                                            |
| Schooling information<br>- Name of school attended<br>- Class information                                                                                    | Whether twins shared a classroom (Grades K through 9)<br>Reasons for classroom assignment                                                                         |
| Inattention and Hyperactivity                                                                                                                                | Strengths and Weaknesses of ADHD-Symptoms and Normal-Behavior (SWAN) Scale (Swanson et al., 2012); 7-point Likert scale                                           |
| Reading and Mathematics enjoyment and engagement                                                                                                             | 5 questions; 7-point Likert scales<br>Reading and maths enjoyment<br>Frequency of self-directed reading or mathematical games (numerical puzzles / pattern games) |
| Homework behavior                                                                                                                                            | 4 questions; hours per day / 7-point likert scales<br>Hours per day<br>Parent involvement with homework<br>Parent help with English and Maths                     |
| Tutoring                                                                                                                                                     | Subject areas and hours tutored per week<br>NAPLAN preparation outside school hours                                                                               |
| Extracurricular activities                                                                                                                                   | Hours per week participating in Sports / Music / Clubs                                                                                                            |
| Screen time                                                                                                                                                  | Hours per week- and weekend-day spent on<br>- Television<br>- Video games<br>- Internet<br>Access to technological devices                                        |
| Sleep                                                                                                                                                        | Same / different bedroom<br>9 items from The Children's Sleep Habits Questionnaire (CSHQ; Owens et al., 2000);<br>7-point likert scale                            |
| Diet                                                                                                                                                         | 5 questions on usual dietary behaviors; frequency rating                                                                                                          |
| Stressful life events                                                                                                                                        | Free text                                                                                                                                                         |

Note. \*These items were only asked at Grade 3

## AUSTRALIAN TWIN STUDY OF LITERACY AND NUMERACY

### References

- Australian Bureau of Statistics (2016). *Australian Standard Classification of Cultural and Ethnic Groups (ASCCEG), 2016*. Retrieved from <https://www.abs.gov.au/AUSSTATS/abs@.Nsf/7d12b0f6763c78caca257061001cc588/964d7ded6ce6f93aca2578ed0021374b!OpenDocument>
- Ganzeboom, H. B. G., & Treiman, D. J. (1996). Internationally comparable measures of occupational status for the 1988 International Standard Classification of Occupations. *Social Science Research, 25*(3), 201-239. doi:10.1006/ssre.1996.0010
- Ganzeboom, H. B. G. (2010). *A new International Socio-Economic Index (ISEI) of occupational status for the International Standard Classification of Occupation 2008 (ISCO-08) constructed with data from the ISSP 2002-2007*. Paper presented at the Annual Conference of International Social Survey Programme, Lisbon. Retrieved from: [https://www.researchgate.net/publication/242660186\\_A\\_new\\_International\\_SocioEconomic\\_Index\\_ISEI\\_of\\_occupational\\_status\\_for\\_the\\_International\\_Standard\\_Classification\\_of\\_Occupation\\_2008\\_ISCO08\\_constructed\\_with\\_data\\_from\\_the\\_ISSP\\_2002-2007](https://www.researchgate.net/publication/242660186_A_new_International_SocioEconomic_Index_ISEI_of_occupational_status_for_the_International_Standard_Classification_of_Occupation_2008_ISCO08_constructed_with_data_from_the_ISSP_2002-2007)
- Kendler, K. S., & Prescott, C.A. (2007). *Genes, Environment, and Psychopathology: Understanding the Causes of Psychiatric and Substance Use Disorders*. Guilford Press.
- Lykken, D. T., Bouchard, T. J., Jr., McGue, M., & Tellegen, A. (1990). The Minnesota Twin Family Registry: Some initial findings. *Acta Geneticae Medicae Gemellologiae, 39*(1), 35-70. doi:10.1017/s0001566000005572
- Matheny, A.P., Wachs, T.D., Ludwig, J.L., & Phillips, K. (1995). Bringing order out of chaos: Psychometric characteristics of the Confusion, Hubbub and Order Scale. *Journal of Applied Developmental Psychology, 16*, 429-444. doi:10.1016/0193-3973(95)90028-4

## AUSTRALIAN TWIN STUDY OF LITERACY AND NUMERACY

- Owens, J. A., Spirito, A., & McGuinn, M. (2000). The Children's Sleep Habits Questionnaire (CSHQ): Psychometric properties of a survey instrument for school-aged children. *Sleep, 23*(8), 1043-1051.
- Smith, F. M., & Hausafus, C. O. (1998). Relationship of family support and ethnic minority students' achievement in science and mathematics. *Science Education, 82*(1), 111-125. doi:10.1002/(sici)1098-237x(199801)82:1<111::aid-sce6>3.0.co;2-k
- Swanson, J. M., Schuck, S., Porter, M. M., Carlson, C., Hartman, C. A., Sergeant, J. A., . . . Wigal, T. (2012). Categorical and dimensional definitions and evaluations of symptoms of ADHD: History of the SNAP and the SWAN rating scales. *The International Journal of Educational and Psychological Assessment, 10*(1), 51-70.
